# Supplementary material for: Risk of venous thromboembolism in men with prostate cancer compared with men in the general population: a nationwide population-based cohort study in Sweden
Source: HighWire-hosted journal article supplement (doi:10.1136/bmjopen-2021-055485), 2022-05-01
Supplement: bmjopen-2021-055485supp001_data_supplement.pdf [file bmjopen-2021-055485supp001_data_supplement.pdf]

**Supplementary Table 1.** Clinical characteristics of men with prostate cancer at cancer diagnosis (N=92,105).

|                                   | Prostate cancer cohort<br>92,105<br>n (%) |          |
|-----------------------------------|-------------------------------------------|----------|
|                                   | n                                         | %        |
| <b>TNM stage</b>                  |                                           |          |
| T1                                | 47,658                                    | 51.7     |
| T2                                | 27,389                                    | 29.7     |
| T3                                | 14,342                                    | 15.6     |
| T4                                | 2,612                                     | 2.8      |
| Missing                           | 104                                       | 0.1      |
| N0                                | 17,789                                    | 19.3     |
| N1                                | 2725                                      | 3.0      |
| NX                                | 71,445                                    | 77.6     |
| Missing                           | 146                                       | 0.2      |
| M0                                | 57,637                                    | 62.6     |
| M1                                | 7310                                      | 7.9      |
| MX                                | 26,990                                    | 29.3     |
| Missing                           | 168                                       | 0.2      |
| <b>Prostate cancer risk group</b> |                                           |          |
| Low                               | 26,251                                    | 28.5     |
| Intermediate                      | 29,235                                    | 31.7     |
| High                              | 19,523                                    | 21.2     |
| Regionally metastasized           | 5294                                      | 5.7      |
| Distant metastases                | 10,615                                    | 11.5     |
| Missing                           | 1187                                      | 1.3      |
| <b>PSA at diagnosis (mg/l)</b>    |                                           |          |
| <3                                | 3331                                      | 3.6      |
| 3–10                              | 49,178                                    | 53.4     |
| 11–50                             | 26,284                                    | 28.5     |
| ≥51                               | 11,822                                    | 12.8     |
| Missing                           | 1490                                      | 1.6      |
| Mean (SD)                         | 72.7                                      | 565.6    |
| Median (Q1–Q3)                    | 8.8                                       | 5.4–20.0 |

PSA, prostate-specific antigen; TNM, tumour-node-metastasis

**Supplementary Table 2.** Five-year incidence proportion (95% CI) of first VTE among men with and without prostate cancer.

| Time (months) | Prostate cancer cohort<br>N=92,1015 |                               | Comparison cohort<br>N=466,241 |                               | IPR (95% CI)     |
|---------------|-------------------------------------|-------------------------------|--------------------------------|-------------------------------|------------------|
|               | First incident VTE cases, N         | Incidence proportion (95% CI) | First incident VTE cases, N    | Incidence proportion (95% CI) |                  |
| 0             | 0                                   |                               | 0                              |                               |                  |
| 6             | 453                                 | 0.49 (0.45–0.54)              | 908                            | 0.19 (0.18–0.21)              | 2.53 (2.26–2.83) |
| 12            | 790                                 | 0.86 (0.80–0.92)              | 1858                           | 0.40 (0.38–0.42)              | 2.15 (1.98–2.34) |
| 18            | 1 045                               | 1.13 (1.07–1.21)              | 2721                           | 0.58 (0.56–0.61)              | 1.94 (1.81–2.09) |
| 24            | 1 275                               | 1.38 (1.31–1.46)              | 3524                           | 0.76 (0.73–0.78)              | 1.83 (1.72–1.95) |
| 30            | 1 473                               | 1.60 (1.52–1.68)              | 4270                           | 0.92 (0.89–0.94)              | 1.75 (1.65–1.85) |
| 36            | 1 688                               | 1.83 (1.75–1.92)              | 4986                           | 1.07 (1.04–1.10)              | 1.71 (1.62–1.81) |
| 42            | 1 857                               | 2.04 (1.95–2.13)              | 5651                           | 1.21 (1.18–1.24)              | 1.66 (1.58–1.75) |
| 48            | 2 009                               | 2.18 (2.09–2.28)              | 6220                           | 1.33 (1.30–1.37)              | 1.63 (1.56–1.72) |
| 54            | 2 156                               | 2.34 (2.24–2.44)              | 6774                           | 1.45 (1.42–1.49)              | 1.61 (1.54–1.69) |
| 60            | 2 277                               | 2.47 (2.37–2.57)              | 7245                           | 1.55 (1.52–1.59)              | 1.59 (1.52–1.67) |

CI, confidence interval; IPR, incidence proportion ratio; VTE, venous thromboembolism

**Supplementary Table 3.** Five-year incidence proportion (95% CI) of **first DVT** among men with and without prostate cancer.

| Time (months) | Prostate cancer cohort<br>N=92,1015 |                               | Comparison cohort<br>N=466,241 |                               | IPR (95% CI)     |
|---------------|-------------------------------------|-------------------------------|--------------------------------|-------------------------------|------------------|
|               | First incident DVT cases, N         | Incidence proportion (95% CI) | First incident DVT cases, N    | Incidence proportion (95% CI) |                  |
| 0             | 0                                   |                               | 0                              |                               |                  |
| 6             | 240                                 | 0.26 (0.23–0.30)              | 487                            | 0.10 (0.10–0.11)              | 2.49 (2.14–2.91) |
| 12            | 422                                 | 0.46 (0.42–0.50)              | 986                            | 0.21 (0.20–0.22)              | 2.17 (1.93–2.43) |
| 18            | 558                                 | 0.61 (0.56–0.66)              | 1454                           | 0.31 (0.30–0.33)              | 1.94 (1.76–2.14) |
| 24            | 659                                 | 0.72 (0.66–0.77)              | 1880                           | 0.40 (0.39–0.42)              | 1.77 (1.62–1.94) |
| 30            | 765                                 | 0.83 (0.77–0.89)              | 2273                           | 0.49 (0.47–0.51)              | 1.70 (1.57–1.85) |
| 36            | 855                                 | 0.93 (0.87–0.99)              | 2641                           | 0.57 (0.55–0.59)              | 1.64 (1.52–1.77) |
| 42            | 940                                 | 1.02 (0.96–1.09)              | 2997                           | 0.64 (0.62–0.67)              | 1.59 (1.48–1.71) |
| 48            | 1020                                | 1.11 (1.04–1.18)              | 3297                           | 0.71 (0.68–0.73)              | 1.57 (1.46–1.68) |
| 54            | 1105                                | 1.20 (1.13–1.27)              | 3589                           | 0.77 (0.74–0.80)              | 1.56 (1.46–1.67) |
| 60            | 1171                                | 1.27 (1.20–1.35)              | 3835                           | 0.82 (0.80–0.85)              | 1.55 (1.45–1.65) |

CI, confidence interval; DVT, deep vein thrombosis; IPR, incidence proportion ratio

**Supplementary Table 4.** Five-year incidence proportion (95% CI) of first PE among men with and without prostate cancer.

| Time (months) | Prostate cancer cohort<br>N=92,1015 |                               | Comparison cohort<br>N=466,241 |                               | IPR (95% CI)     |
|---------------|-------------------------------------|-------------------------------|--------------------------------|-------------------------------|------------------|
|               | First incident PE cases, N          | Incidence proportion (95% CI) | First incident PE cases, N     | Incidence proportion (95% CI) |                  |
| 0             | 0                                   |                               | 0                              |                               |                  |
| 6             | 193                                 | 0.21 (0.18–0.24)              | 388                            | 0.08 (0.08–0.09)              | 2.52 (2.12–2.99) |
| 12            | 343                                 | 0.37 (0.33–0.41)              | 803                            | 0.17 (0.16–0.18)              | 2.16 (1.91–2.45) |
| 18            | 455                                 | 0.49 (0.45–0.54)              | 1188                           | 0.25 (0.24–0.27)              | 1.94 (1.74–2.16) |
| 24            | 581                                 | 0.63 (0.58–0.68)              | 1554                           | 0.33 (0.32–0.35)              | 1.89 (1.72–2.08) |
| 30            | 670                                 | 0.73 (0.67–0.78)              | 1907                           | 0.41 (0.39–0.43)              | 1.78 (1.63–1.94) |
| 36            | 791                                 | 0.86 (0.80–0.92)              | 2248                           | 0.48 (0.46–0.50)              | 1.78 (1.64–1.93) |
| 42            | 877                                 | 0.95 (0.89–1.02)              | 2558                           | 0.55 (0.53–0.57)              | 1.74 (1.61–1.87) |
| 48            | 951                                 | 1.03 (0.97–1.10)              | 2837                           | 0.61 (0.59–0.63)              | 1.70 (1.58–1.83) |
| 54            | 1 023                               | 1.11 (1.04–1.18)              | 3116                           | 0.67 (0.65–0.69)              | 1.66 (1.55–1.78) |
| 60            | 1 078                               | 1.17 (1.10–1.24)              | 3344                           | 0.72 (0.69–0.74)              | 1.63 (1.52–1.75) |

CI, confidence interval; IPR, incidence proportion ratio; PE, pulmonary embolism

**Supplementary Table 5.** Age-stratified incidence rates of first VTE per 1000 person-years (95% CI) in men with prostate cancer and men without prostate cancer, and HRs (95% CI) comparing the two cohorts.

| Age (years)                                          | Prostate cancer cohort<br>N=92,1015 | Comparison cohort<br>N=466,241 |
|------------------------------------------------------|-------------------------------------|--------------------------------|
| <b>&lt;60</b>                                        |                                     |                                |
| Incidence rate of VTE per 1000 person-years (95% CI) | 4.56 (4.05–5.13)                    | 2.38 (2.21–2.55)               |
| Crude HR (95% CI)                                    | 1.92 (1.67–2.20)                    | 1.0 (reference)                |
| <b>60–64</b>                                         |                                     |                                |
| Incidence rate of VTE per 1000 person-years (95% CI) | 5.20 (4.74–8.72)                    | 3.36 (3.19–3.54)               |
| Crude HR (95% CI)                                    | 1.55 (1.39–1.72)                    | 1.0 (reference)                |
| <b>65–69</b>                                         |                                     |                                |
| Incidence rate of VTE per 1000 person-years (95% CI) | 6.32 (5.88–6.80)                    | 4.02 (3.86–4.19)               |
| Crude HR (95% CI)                                    | 1.57 (1.44–1.71)                    | 1.0 (reference)                |
| <b>70–74</b>                                         |                                     |                                |
| Incidence rate of VTE per 1000 person-years (95% CI) | 7.24 (6.71–7.84)                    | 4.66 (4.60–4.86)               |
| Crude HR (95% CI)                                    | 1.56 (1.42–1.70)                    | 1.0 (reference)                |
| <b>75–79</b>                                         |                                     |                                |
| Incidence rate of VTE per 1000 person-years (95% CI) | 7.92 (7.22–8.67)                    | 5.53 (5.27–5.80)               |
| Crude IRR (95% CI)                                   | 1.43 (1.29–1.59)                    | 1.0 (reference)                |
| <b>80–84</b>                                         |                                     |                                |
| Incidence rate of VTE per 1000 person-years (95% CI) | 8.40 (7.46–9.47)                    | 6.11 (5.75–6.49)               |
| Crude HR (95% CI)                                    | 1.37 (1.20–1.57)                    | 1.0 (reference)                |
| <b>≥85</b>                                           |                                     |                                |
| Incidence rate of VTE per 1000 person-years (95% CI) | 9.86 (8.45–11.49)                   | 6.88 (6.35–7.45)               |
| Crude HR (95% CI)                                    | 1.44 (1.21–1.71)                    | 1.0 (reference)                |

CI, confidence interval; HR, hazard ratio; VTE, venous thromboembolism

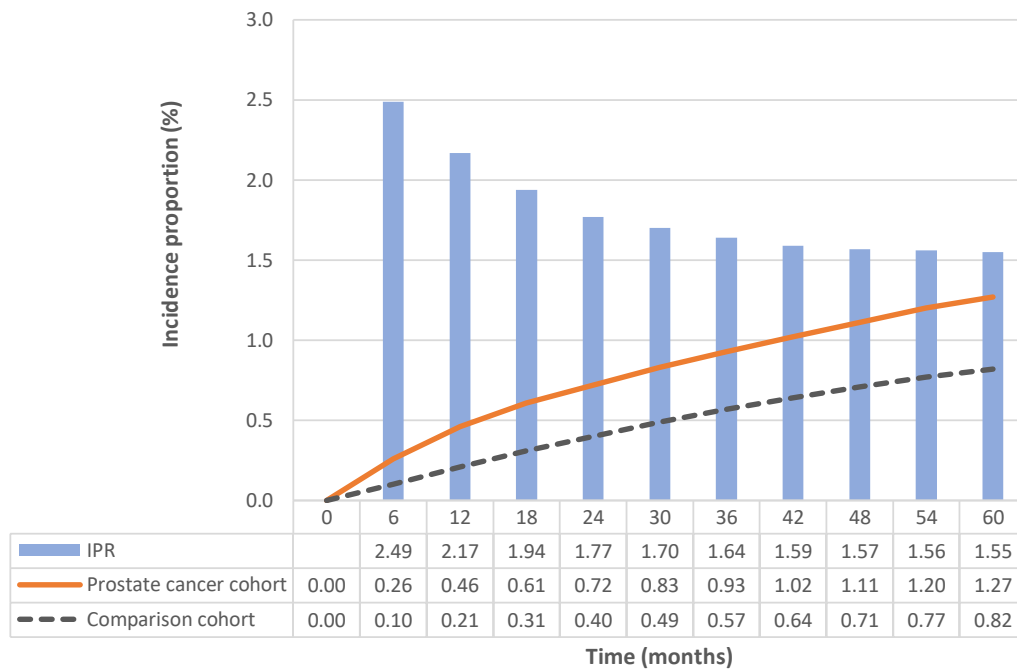

**Supplementary Figure 1.** Five-year incidence proportion of **first DVT** in the prostate cancer cohort and the comparison cohort.

CI, confidence interval; DVT, deep vein thrombosis; IPR, incidence proportion ratio; RR, rate ratio

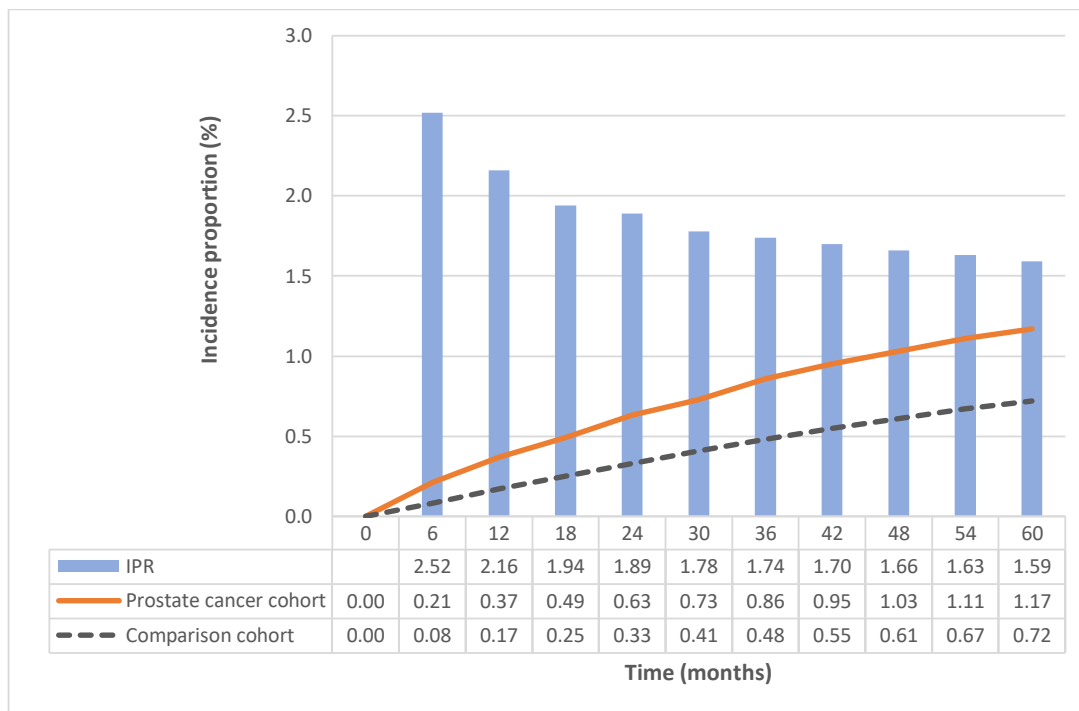

**Supplementary Figure 2.** Five-year incidence proportion of **first PE** among men with and without prostate cancer.

CI, confidence interval; IPR, incidence proportion ratio; PE, pulmonary embolism; RR, rate ratio
